# Supplementary material for: Hibiscus Flower and Olive Leaf Extracts Activate Apoptosis in SH-SY5Y Cells
Source: MDPI journal article supplement (doi:10.3390/antiox10121962), 2021-12-07
Supplement: s1 [file s1]

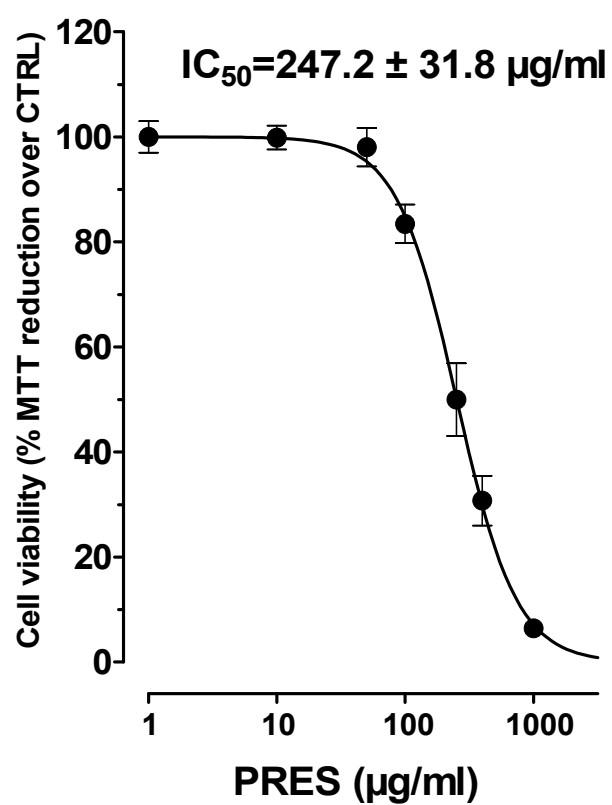

**Figure S1.** Graphical determination of PRES IC<sub>50</sub> obtained by fitting data according to a sigmoid equation with variable slope. IC<sub>50</sub> is reported as mean  $\pm$  SEMs of six independent experiments.
